# Supplementary material
Source: Elsevier journal article supplement (https://www.sciencedirect.com/science/article/pii/S1888429622000395)
Supplement: mmc1 [file S1888429622000395:mmc1.docx]

**Evaluation of Optometrists’ Perspectives of Artificial Intelligence in Eye Care**

**Principal Investigator:** Angelica Scanzera, OD, Assistant Professor of Ophthalmology, University of Illinois at Chicago

**The purpose of this survey study is to determine optometrists’ attitudes towards artificial intelligence (AI) for clinical decision-making. Your participation in this study is voluntary, and confidentiality will be maintained to the degree permitted by the technology used. Your participation in this online survey involves risks similar to a person’s everyday use of the Internet. We will not collect identifying information such as your name or email address. The data collected will be stored in Qualtrics, a protected web based platform. The results of this study will help us understand optometrists’ perceptions of AI in eye care.**

**Address and Contact Information:**

1855 W. Taylor Street

Chicago, IL 60612

Phone: (312) 996-6590

**I understand participation is voluntary and that my responses will remain confidential and data will be de-identified. I understand that by completing the survey, I agree to participate in this study.**

- Yes, I consent.
- No, I do not consent.

Q1 Which of the following best describes you?

- Optometrist
- Optometry resident
- Optometry student
- Other

Q2 What is your gender?

- Male
- Female

Q3 In what year did you or will you graduate optometry school?

________________________________________________________________

Q4a What is your primary mode of practice?

- Private optometry practice (individual or group)
- Group OD/MD practice
- Community Health Center
- Commercial/corporate practice
- Veterans Administration
- Optometry School
- Academic Medical Center
- Other

Q4b Other mode of practice.

________________________________________________________________

Q5a Did you complete a residency?

- Yes
- No

Q5b Type of residency (select all that apply).

- Community Health
- Cornea & Contact Lens
- Family Practice
- Low Vision
- Ocular Disease
- Pediatric
- Primary Care
- Refractive & Ocular Surgery
- Vision Therapy & Rehab
- Brain Injury
- Geriatric Optometry

Q6 I am familiar with the use of artificial intelligence in eye care.

- Strongly agree
- Somewhat agree
- Neither agree nor disagree
- Somewhat disagree
- Strongly disagree

Q7 I am concerned about the diagnostic accuracy of artificial intelligence in eye care.

- Strongly agree
- Somewhat agree
- Neither agree nor disagree
- Somewhat disagree
- Strongly disagree

Q8 I am concerned that artificial intelligence will replace doctors.

- Strongly agree
- Somewhat agree
- Neither agree nor disagree
- Somewhat disagree
- Strongly disagree

Q9 Artificial Intelligence will harm the doctor-patient relationship.

- Strongly agree
- Somewhat agree
- Neither agree nor disagree
- Somewhat disagree
- Strongly disagree

Q10 Artificial intelligence should be incorporated into the optometry school or residency curriculum.

- Strongly agree
- Somewhat agree
- Neither agree nor disagree
- Somewhat disagree
- Strongly disagree

Q11 Artificial intelligence will improve the practice of optometry.

- Strongly agree
- Somewhat agree
- Neither agree nor disagree
- Somewhat disagree
- Strongly disagree

Q12 Prior to the COVID-19 pandemic, I would have been willing to incorporate artificial intelligence into my practice.

- Strongly agree
- Somewhat agree
- Neither agree nor disagree
- Somewhat disagree
- Strongly disagree

Q13 In response to COVID-19 pandemic, I would be willing to incorporate artificial intelligence into my practice.

- Strongly agree
- Somewhat agree
- Neither agree nor disagree
- Somewhat disagree
- Strongly disagree

Q14a What role do you think artificial intelligence should have in the future of eye care (select all that apply)?

- Screening for eye disease
- Diagnosis of eye disease
- Monitoring the progression of eye disease
- Making management decisions related to eye disease
- Determining refractive error
- Triaging patients and assisting with scheduling
- Other

Q14b If you selected 'other' to the previous question, please explain.

________________________________________________________________

Q15 What do you see as the primary role(s) of artificial intelligence in the future of eye care (optional)?

________________________________________________________________

________________________________________________________________

________________________________________________________________

________________________________________________________________

________________________________________________________________

Q16 How do you feel artificial intelligence can improve health care delivery in optometry (optional)?

________________________________________________________________

________________________________________________________________

________________________________________________________________

________________________________________________________________

________________________________________________________________

Q17 What challenges do you anticipate with the use of artificial intelligence in optometry (optional)?

________________________________________________________________

________________________________________________________________

________________________________________________________________

________________________________________________________________

________________________________________________________________
