# Supplementary material
Source: Elsevier journal article supplement (https://www.sciencedirect.com/science/article/pii/S1888429622000395)
Supplement: mmc2 [file S1888429622000395:mmc2.docx]

**Table 4**. Characteristics of those who answered strongly agree/agree to AI will replace them (N=100; 100/400=25%)

| **Variable** | **Summary Statistics, n(%)** |
| --- | --- |
| **Completion of optometric residency** |  |
| Yes | 40/223 (18%) |
| No | 60/177 (34%) |
| **Year of graduation** |  |
| 1990 or earlier | 27/158 (17%) |
| 1991-2000 | 22/72 (30%) |
| 2001-2010 | 28/90 (31%) |
| 2011 or later | 23/80 (29%) |
| **Type of Practice** |  |
| Private practice | 34/132 (25%) |
| Not private practice | 66/268 (25%) |

**Table 5**. Characteristics of those who answered strongly agree/agree having concerns about accuracy of AI (N=212; 212/400=53%)

| **Variable** | **Summary Statistics, n(%)** |
| --- | --- |
| **Completion of optometric residency** |  |
| Yes | 137/223 (61%) |
| No | 75/177 (42%) |
| **Year of graduation** |  |
| 1990 or earlier | 72/158 (46%) |
| 1991-2000 | 37/72 (51%) |
| 2001-2010 | 51/90 (57%) |
| 2011 or later | 52/80 (65%) |
| **Type of Practice** |  |
| Private practice | 74/132 (56%) |
| Not private practice | 138/268 (51%) |
